# Supplementary material for: Greater male than female variability in regional brain structure across the lifespan
Source: PubMed Central journal article supplement (PMC8675415; doi:10.1002/hbm.25204), 2020-10-12
Supplement: HBM-43-470-s002.pdf [file HBM-43-470-s002.pdf]

Supplementary Table 2A

| Subcortical volume | Female (n=7141) | Male (n=6555) | Mean difference test |           | Variance Ratio test |    |
|--------------------|-----------------|---------------|----------------------|-----------|---------------------|----|
|                    | M               | M             | P                    | Cohen's D | VR                  | P  |
| left thal          | -174.193        | 189.936       | **                   | 0.504     | 0.233               | ** |
| right thal         | -175.412        | 191.140       | **                   | 0.576     | 0.364               | ** |
| left caud          | -65.407         | 71.566        | **                   | 0.311     | 0.163               | ** |
| right caud         | -70.631         | 78.224        | **                   | 0.328     | 0.133               | ** |
| left put           | -133.575        | 144.498       | **                   | 0.453     | 0.205               | ** |
| right put          | -132.828        | 144.790       | **                   | 0.483     | 0.218               | ** |
| left pal           | -54.597         | 59.591        | **                   | 0.510     | 0.321               | ** |
| right pal          | -44.439         | 48.627        | **                   | 0.504     | 0.357               | ** |
| left hippo         | -73.545         | 79.192        | **                   | 0.387     | 0.119               | ** |
| right hippo        | -67.811         | 74.070        | **                   | 0.368     | 0.221               | ** |
| left amyg          | -45.046         | 48.757        | **                   | 0.492     | 0.156               | ** |
| right amyg         | -49.629         | 53.719        | **                   | 0.515     | 0.216               | ** |
| left accumb        | -10.863         | 11.819        | **                   | 0.208     | 0.162               | ** |
| right accumb       | -11.997         | 13.134        | **                   | 0.248     | 0.133               | ** |

Supplementary Table 2B

| Surface area                   | Female (n=6243) |  | Male (n=5092) |  | Mean difference test |           | Variance Ratio test |    |
|--------------------------------|-----------------|--|---------------|--|----------------------|-----------|---------------------|----|
|                                | M               |  | M             |  | P                    | Cohen's D | VR                  | P  |
| left bankssts                  | -21.428         |  | 26.514        |  | **                   | 0.303     | 0.288               | ** |
| left caudalanteriorcingulate   | -7.761          |  | 9.655         |  | **                   | 0.138     | 0.144               | ** |
| left caudalmiddlefrontal       | -32.171         |  | 40.016        |  | **                   | 0.218     | 0.174               | ** |
| left cuneus                    | -23.913         |  | 28.961        |  | **                   | 0.288     | 0.213               | ** |
| left entorhinal                | -9.573          |  | 11.775        |  | **                   | 0.282     | 0.318               | ** |
| left fusiform                  | -59.732         |  | 73.637        |  | **                   | 0.401     | 0.218               | ** |
| left inferiorparietal          | -89.239         |  | 110.767       |  | **                   | 0.388     | 0.290               | ** |
| left inferiortemporal          | -69.130         |  | 84.488        |  | **                   | 0.403     | 0.198               | ** |
| left isthmuscingulate          | -26.185         |  | 32.319        |  | **                   | 0.424     | 0.309               | ** |
| left lateraloccipital          | -116.996        |  | 144.255       |  | **                   | 0.534     | 0.241               | ** |
| left lateralorbitofrontal      | -33.519         |  | 41.514        |  | **                   | 0.348     | 0.170               | ** |
| left lingual                   | -44.627         |  | 54.474        |  | **                   | 0.276     | 0.210               | ** |
| left medialorbitofrontal       | -32.826         |  | 40.488        |  | **                   | 0.373     | 0.276               | ** |
| left middletemporal            | -55.369         |  | 68.345        |  | **                   | 0.396     | 0.261               | ** |
| left parahippocampal           | -10.153         |  | 12.606        |  | **                   | 0.234     | 0.324               | ** |
| left paracentral               | -19.674         |  | 24.133        |  | **                   | 0.270     | 0.294               | ** |
| left parsopercularis           | -23.321         |  | 28.224        |  | **                   | 0.214     | 0.365               | ** |
| left parsorbitalis             | -12.910         |  | 15.872        |  | **                   | 0.401     | 0.195               | ** |
| left parstriangularis          | -26.699         |  | 32.436        |  | **                   | 0.326     | 0.267               | ** |
| left pericalcarine             | -18.170         |  | 22.274        |  | **                   | 0.198     | 0.139               | ** |
| left postcentral               | -75.090         |  | 92.913        |  | **                   | 0.462     | 0.314               | ** |
| left posteriorcingulate        | -21.743         |  | 26.882        |  | **                   | 0.317     | 0.254               | ** |
| left precentral                | -97.158         |  | 120.713       |  | **                   | 0.551     | 0.316               | ** |
| left precuneus                 | -67.764         |  | 83.523        |  | **                   | 0.437     | 0.283               | ** |
| left rostralanteriorcingulate  | -14.519         |  | 17.886        |  | **                   | 0.256     | 0.169               | ** |
| left rostralmiddlefrontal      | -136.648        |  | 169.107       |  | **                   | 0.549     | 0.293               | ** |
| left superiorfrontal           | -141.866        |  | 175.228       |  | **                   | 0.559     | 0.228               | ** |
| left superiorparietal          | -79.266         |  | 98.252        |  | **                   | 0.344     | 0.227               | ** |
| left superiortemporal          | -85.038         |  | 104.778       |  | **                   | 0.592     | 0.208               | ** |
| left supramarginal             | -94.686         |  | 117.258       |  | **                   | 0.487     | 0.304               | ** |
| left frontalpole               | -3.241          |  | 3.968         |  | **                   | 0.221     | 0.231               | ** |
| left temporalpole              | -8.189          |  | 10.093        |  | **                   | 0.316     | 0.219               | ** |
| left transversetemporal        | -8.304          |  | 10.195        |  | **                   | 0.268     | 0.217               | ** |
| left insula                    | -39.534         |  | 48.789        |  | **                   | 0.474     | 0.229               | ** |
| right bankssts                 | -19.472         |  | 24.007        |  | **                   | 0.337     | 0.269               | ** |
| right caudalanteriorcingulate  | -12.282         |  | 15.246        |  | **                   | 0.193     | 0.283               | ** |
| right caudalmiddlefrontal      | -31.934         |  | 39.450        |  | **                   | 0.213     | 0.229               | ** |
| right cuneus                   | -26.831         |  | 32.861        |  | **                   | 0.330     | 0.236               | ** |
| right entorhinal               | -9.061          |  | 11.120        |  | **                   | 0.260     | 0.331               | ** |
| right fusiform                 | -75.126         |  | 91.735        |  | **                   | 0.525     | 0.197               | ** |
| right inferiorparietal         | -135.284        |  | 166.645       |  | **                   | 0.540     | 0.306               | ** |
| right inferiortemporal         | -64.768         |  | 79.764        |  | **                   | 0.413     | 0.188               | ** |
| right isthmuscingulate         | -21.334         |  | 26.370        |  | **                   | 0.375     | 0.321               | ** |
| right lateraloccipital         | -114.231        |  | 139.966       |  | **                   | 0.515     | 0.267               | ** |
| right lateralorbitofrontal     | -36.896         |  | 46.038        |  | **                   | 0.349     | 0.221               | ** |
| right lingual                  | -44.954         |  | 55.584        |  | **                   | 0.300     | 0.245               | ** |
| right medialorbitofrontal      | -30.524         |  | 37.532        |  | **                   | 0.404     | 0.223               | ** |
| right middletemporal           | -66.294         |  | 81.941        |  | **                   | 0.463     | 0.234               | ** |
| right parahippocampal          | -14.183         |  | 17.365        |  | **                   | 0.367     | 0.319               | ** |
| right paracentral              | -22.852         |  | 28.213        |  | **                   | 0.271     | 0.332               | ** |
| right parsopercularis          | -20.480         |  | 25.363        |  | **                   | 0.211     | 0.323               | ** |
| right parsorbitalis            | -16.572         |  | 20.550        |  | **                   | 0.414     | 0.178               | ** |
| right parstriangularis         | -34.599         |  | 42.647        |  | **                   | 0.341     | 0.270               | ** |
| right pericalcarine            | -19.021         |  | 23.521        |  | **                   | 0.198     | 0.151               | ** |
| right postcentral              | -70.424         |  | 87.713        |  | **                   | 0.443     | 0.292               | ** |
| right posteriorcingulate       | -20.435         |  | 24.929        |  | **                   | 0.295     | 0.240               | ** |
| right precentral               | -110.167        |  | 136.382       |  | **                   | 0.587     | 0.339               | ** |
| right precuneus                | -84.731         |  | 104.341       |  | **                   | 0.501     | 0.255               | ** |
| right rostralanteriorcingulate | -13.300         |  | 16.469        |  | **                   | 0.257     | 0.203               | ** |
| right rostralmiddlefrontal     | -124.963        |  | 153.957       |  | **                   | 0.488     | 0.225               | ** |
| right superiorfrontal          | -141.040        |  | 173.327       |  | **                   | 0.543     | 0.270               | ** |
| right superiorparietal         | -85.848         |  | 104.679       |  | **                   | 0.382     | 0.212               | ** |
| right superiortemporal         | -52.348         |  | 64.673        |  | **                   | 0.408     | 0.231               | ** |
| right supramarginal            | -68.219         |  | 83.861        |  | **                   | 0.362     | 0.287               | ** |
| right frontalpole              | -4.746          |  | 5.920         |  | **                   | 0.247     | 0.186               | ** |
| right temporalpole             | -5.293          |  | 6.502         |  | **                   | 0.208     | 0.240               | ** |
| right transversetemporal       | -5.637          |  | 6.918         |  | **                   | 0.245     | 0.178               | ** |
| right insula                   | -48.677         |  | 60.048        |  | **                   | 0.513     | 0.224               | ** |

Supplementary Table 2C

| Thickness                      | Female (n=6620)<br>M | Male (n=5913)<br>M | Mean difference test<br>P | Cohen's D | Variance<br>VR | Ratio test<br>P |
|--------------------------------|----------------------|--------------------|---------------------------|-----------|----------------|-----------------|
| left bankssts                  | -0.001               | 0.002              | n.s.                      | 0.014     | 0.023          | **              |
| left caudalanteriorcingulate   | 0.024                | -0.026             | **                        | 0.203     | -0.035         | n.s.            |
| left caudalmiddlefrontal       | 0.005                | -0.006             | **                        | 0.084     | 0.062          | n.s.            |
| left cuneus                    | -0.001               | 0.002              | n.s.                      | 0.028     | 0.081          | *               |
| left entorhinal                | -0.016               | 0.018              | **                        | 0.100     | 0.011          | n.s.            |
| left fusiform                  | -0.001               | 0.001              | n.s.                      | 0.015     | 0.016          | n.s.            |
| left inferiorparietal          | 0.006                | -0.006             | **                        | 0.115     | 0.126          | **              |
| left inferiortemporal          | -0.004               | 0.005              | **                        | 0.067     | -0.040         | n.s.            |
| left isthmuscingulate          | 0.007                | -0.007             | **                        | 0.072     | -0.028         | **              |
| left lateraloccipital          | 0.002                | -0.002             | *                         | 0.044     | 0.111          | **              |
| left lateralorbitofrontal      | -0.004               | 0.006              | **                        | 0.071     | 0.082          | **              |
| left lingual                   | -0.005               | 0.006              | **                        | 0.090     | 0.051          | n.s.            |
| left medialorbitofrontal       | -0.006               | 0.008              | **                        | 0.087     | 0.000          | n.s.            |
| left middletemporal            | -0.005               | 0.007              | **                        | 0.087     | 0.045          | n.s.            |
| left parahippocampal           | 0.013                | -0.013             | **                        | 0.085     | 0.011          | n.s.            |
| left paracentral               | 0.004                | -0.003             | *                         | 0.048     | 0.041          | **              |
| left parsopercularis           | -0.004               | 0.005              | **                        | 0.066     | 0.063          | **              |
| left parsorbitalis             | 0.010                | -0.011             | **                        | 0.102     | 0.037          | **              |
| left parstriangularis          | 0.002                | -0.002             | n.s.                      | 0.025     | 0.027          | **              |
| left pericalcarine             | -0.001               | 0.002              | n.s.                      | 0.026     | 0.068          | **              |
| left postcentral               | 0.006                | -0.007             | **                        | 0.122     | 0.055          | **              |
| left posteriorcingulate        | 0.003                | -0.003             | n.s.                      | 0.037     | 0.063          | **              |
| left precentral                | 0.004                | -0.004             | **                        | 0.066     | 0.077          | **              |
| left precuneus                 | -0.002               | 0.003              | n.s.                      | 0.040     | 0.058          | **              |
| left rostralanteriorcingulate  | 0.018                | -0.020             | **                        | 0.166     | -0.066         | n.s.            |
| left rostralmiddlefrontal      | 0.002                | -0.002             | n.s.                      | 0.031     | 0.073          | **              |
| left superiorfrontal           | 0.010                | -0.011             | **                        | 0.174     | 0.037          | n.s.            |
| left superiorparietal          | 0.006                | -0.006             | **                        | 0.119     | 0.138          | **              |
| left superiortemporal          | -0.004               | 0.005              | **                        | 0.062     | 0.042          | **              |
| left supramarginal             | 0.007                | -0.007             | **                        | 0.119     | 0.067          | **              |
| left frontalpole               | 0.013                | -0.014             | **                        | 0.091     | 0.024          | n.s.            |
| left temporalpole              | 0.000                | -0.001             | n.s.                      | 0.003     | 0.011          | n.s.            |
| left transversetemporal        | 0.017                | -0.018             | **                        | 0.169     | 0.011          | n.s.            |
| left insula                    | -0.011               | 0.012              | **                        | 0.163     | 0.042          | n.s.            |
| right bankssts                 | -0.003               | 0.004              | *                         | 0.046     | 0.052          | **              |
| right caudalanteriorcingulate  | 0.025                | -0.028             | **                        | 0.233     | -0.061         | n.s.            |
| right caudalmiddlefrontal      | 0.006                | -0.006             | **                        | 0.090     | 0.011          | **              |
| right cuneus                   | 0.000                | 0.000              | n.s.                      | 0.001     | 0.045          | *               |
| right entorhinal               | 0.002                | -0.003             | n.s.                      | 0.013     | 0.010          | n.s.            |
| right fusiform                 | -0.001               | 0.002              | n.s.                      | 0.027     | 0.005          | n.s.            |
| right inferiorparietal         | 0.005                | -0.005             | **                        | 0.098     | 0.109          | **              |
| right inferiortemporal         | -0.002               | 0.003              | n.s.                      | 0.035     | 0.002          | n.s.            |
| right isthmuscingulate         | 0.008                | -0.009             | **                        | 0.088     | -0.045         | **              |
| right lateraloccipital         | 0.002                | -0.001             | n.s.                      | 0.022     | 0.098          | **              |
| right lateralorbitofrontal     | 0.001                | 0.000              | n.s.                      | 0.010     | 0.049          | **              |
| right lingual                  | -0.004               | 0.005              | **                        | 0.070     | 0.061          | n.s.            |
| right medialorbitofrontal      | 0.001                | 0.000              | n.s.                      | 0.009     | 0.037          | n.s.            |
| right middletemporal           | -0.006               | 0.007              | **                        | 0.099     | 0.060          | **              |
| right parahippocampal          | 0.019                | -0.020             | **                        | 0.153     | 0.032          | n.s.            |
| right paracentral              | 0.002                | -0.002             | n.s.                      | 0.028     | 0.051          | **              |
| right parsopercularis          | -0.002               | 0.003              | n.s.                      | 0.031     | 0.000          | **              |
| right parsorbitalis            | 0.015                | -0.016             | **                        | 0.155     | 0.007          | n.s.            |
| right parstriangularis         | 0.002                | -0.002             | n.s.                      | 0.029     | -0.016         | **              |
| right pericalcarine            | 0.000                | 0.000              | n.s.                      | 0.002     | 0.028          | n.s.            |
| right postcentral              | 0.007                | -0.007             | **                        | 0.121     | -0.012         | **              |
| right posteriorcingulate       | 0.005                | -0.005             | **                        | 0.067     | -0.021         | *               |
| right precentral               | 0.005                | -0.005             | **                        | 0.091     | 0.052          | **              |
| right precuneus                | -0.003               | 0.004              | **                        | 0.059     | 0.048          | **              |
| right rostralanteriorcingulate | 0.008                | -0.008             | **                        | 0.067     | 0.033          | n.s.            |
| right rostralmiddlefrontal     | 0.003                | -0.003             | **                        | 0.053     | 0.073          | **              |
| right superiorfrontal          | 0.010                | -0.011             | **                        | 0.169     | 0.045          | n.s.            |
| right superiorparietal         | 0.006                | -0.006             | **                        | 0.119     | 0.102          | **              |
| right superiortemporal         | -0.006               | 0.007              | **                        | 0.094     | 0.077          | **              |
| right supramarginal            | 0.004                | -0.004             | **                        | 0.069     | 0.051          | **              |
| right frontalpole              | 0.018                | -0.019             | **                        | 0.131     | -0.009         | n.s.            |
| right temporalpole             | -0.010               | 0.011              | **                        | 0.060     | 0.005          | n.s.            |
| right transversetemporal       | 0.008                | -0.008             | **                        | 0.077     | 0.104          | *               |
| right insula                   | -0.010               | 0.012              | **                        | 0.142     | 0.069          | **              |

Supplementary Table 3A

| Subcortical  | Intercept | (s.e.) | P  | Age2     | (s.e.)  | P  | Sex    | (s.e.) | P  | Sex by age2 | (s.e.)   | P    |
|--------------|-----------|--------|----|----------|---------|----|--------|--------|----|-------------|----------|------|
| left thal    | 613.049   | 6.008  | ** | 8695.484 | 716.539 | ** | 74.940 | 8.682  | ** | -1187.243   | 1014.991 | n.s. |
| right thal   | 531.871   | 5.364  | ** | 4171.752 | 639.774 | ** | 95.209 | 7.752  | ** | -1244.554   | 906.251  | n.s. |
| left caud    | 364.783   | 3.521  | ** | 2190.319 | 419.998 | ** | 29.834 | 5.089  | ** | 834.754     | 594.934  | n.s. |
| right caud   | 377.897   | 3.603  | ** | 3303.418 | 429.729 | ** | 28.284 | 5.207  | ** | 479.254     | 608.719  | n.s. |
| left put     | 495.407   | 4.834  | ** | 6160.964 | 576.548 | ** | 57.544 | 6.986  | ** | -323.645    | 816.691  | n.s. |
| right put    | 464.079   | 4.595  | ** | 6698.088 | 547.991 | ** | 50.995 | 6.640  | ** | -614.940    | 776.239  | n.s. |
| left pal     | 170.576   | 1.763  | ** | 1939.804 | 210.284 | ** | 27.772 | 2.548  | ** | -317.629    | 297.871  | n.s. |
| right pal    | 143.455   | 1.497  | ** | 1092.346 | 178.526 | ** | 23.127 | 2.163  | ** | 90.990      | 252.886  | n.s. |
| left hippo   | 320.138   | 3.201  | ** | 3512.741 | 381.787 | ** | 31.862 | 4.626  | ** | -1374.551   | 540.807  | n.s. |
| right hippo  | 311.867   | 3.121  | ** | 2672.383 | 372.203 | ** | 39.214 | 4.510  | ** | -605.863    | 527.232  | n.s. |
| left amyg    | 151.438   | 1.523  | ** | 1726.265 | 181.644 | ** | 14.425 | 2.201  | ** | -576.511    | 257.302  | n.s. |
| right amyg   | 156.565   | 1.596  | ** | 1835.945 | 190.409 | ** | 16.531 | 2.307  | ** | -660.039    | 269.717  | n.s. |
| left accumb  | 85.209    | 0.858  | ** | 1188.991 | 102.329 | ** | 6.094  | 1.240  | ** | -58.930     | 144.951  | n.s. |
| right accumb | 80.431    | 0.786  | ** | 1059.372 | 93.692  | ** | 5.613  | 1.135  | ** | -244.057    | 132.716  | n.s. |

Supplementary Table 3B

| Surface area                   | Intercept | (s.e.) | P  | Age2     | (s.e.)  | P    | Sex    | (s.e.) | P  | Sex by age2 | (s.e.)  | P    |
|--------------------------------|-----------|--------|----|----------|---------|------|--------|--------|----|-------------|---------|------|
| left bankssts                  | 126.857   | 1.375  | ** | 468.035  | 148.508 | **   | 16.754 | 2.055  | ** | -144.283    | 217.605 | n.s. |
| left caudalanteriorcingulate   | 126.787   | 1.375  | ** | 439.050  | 148.445 | **   | 16.823 | 2.054  | ** | -122.407    | 217.513 | n.s. |
| left caudalmiddlefrontal       | 104.429   | 1.114  | ** | -125.449 | 120.351 | n.s. | 3.901  | 1.666  | *  | -127.352    | 176.348 | n.s. |
| left cuneus                    | 293.437   | 2.943  | ** | 502.730  | 317.810 | n.s. | 22.109 | 4.398  | ** | 63.451      | 465.680 | n.s. |
| left entorhinal                | 154.473   | 1.609  | ** | -258.284 | 173.761 | n.s. | 13.102 | 2.405  | ** | 285.420     | 254.608 | n.s. |
| left fusiform                  | 57.088    | 0.651  | ** | 246.897  | 70.291  | **   | 9.333  | 0.973  | ** | -60.093     | 102.996 | n.s. |
| left inferiorparietal          | 303.903   | 3.104  | ** | 733.041  | 335.160 | *    | 36.622 | 4.638  | ** | -711.684    | 491.103 | n.s. |
| left inferiortemporal          | 453.623   | 4.702  | ** | 1832.218 | 507.743 | **   | 64.389 | 7.027  | ** | -1264.030   | 743.985 | n.s. |
| left isthmuscingulate          | 351.679   | 3.537  | ** | 2118.970 | 381.998 | **   | 33.152 | 5.287  | ** | -1028.874   | 559.733 | n.s. |
| left lateraloccipital          | 116.786   | 1.250  | ** | 1.485    | 135.027 | n.s. | 19.631 | 1.869  | ** | 208.057     | 197.853 | n.s. |
| left lateralorbitofrontal      | 439.073   | 4.476  | ** | 408.166  | 483.345 | n.s. | 49.659 | 6.689  | ** | 303.046     | 708.234 | n.s. |
| left lingual                   | 207.272   | 2.114  | ** | 837.294  | 228.332 | **   | 21.655 | 3.160  | ** | -397.922    | 334.570 | n.s. |
| left medialorbitofrontal       | 310.562   | 3.142  | ** | 62.805   | 339.266 | n.s. | 29.594 | 4.695  | ** | -899.943    | 497.120 | n.s. |
| left middletemporal            | 172.650   | 1.796  | ** | -186.564 | 193.995 | n.s. | 23.477 | 2.685  | ** | -138.893    | 284.257 | n.s. |
| left parahippocampal           | 296.470   | 2.997  | ** | 1349.148 | 323.622 | **   | 32.342 | 4.479  | ** | -635.081    | 474.196 | n.s. |
| left paracentral               | 72.659    | 0.887  | ** | 146.999  | 95.780  | n.s. | 10.826 | 1.326  | ** | -99.995     | 140.344 | n.s. |
| left parsopercularis           | 133.455   | 1.420  | ** | -209.260 | 153.336 | n.s. | 18.981 | 2.122  | ** | 191.968     | 224.681 | n.s. |
| left parsorbitalis             | 192.892   | 2.113  | ** | 240.095  | 228.190 | n.s. | 32.407 | 3.158  | ** | -19.421     | 334.363 | n.s. |
| left parstriangularis          | 61.740    | 0.641  | ** | 174.928  | 69.257  | *    | 7.148  | 0.958  | ** | -111.706    | 101.481 | n.s. |
| left pericalcarine             | 148.648   | 1.525  | ** | 286.425  | 164.734 | n.s. | 19.352 | 2.280  | ** | -18.396     | 241.381 | n.s. |
| left postcentral               | 171.902   | 1.691  | ** | -361.951 | 182.645 | *    | 13.425 | 2.528  | ** | -136.405    | 267.625 | n.s. |
| left posteriorcingulate        | 340.826   | 3.576  | ** | 88.942   | 386.228 | n.s. | 46.216 | 5.345  | ** | -999.934    | 565.932 | n.s. |
| left precentral                | 130.418   | 1.364  | ** | -272.664 | 147.314 | n.s. | 13.878 | 2.039  | ** | 25.470      | 215.856 | n.s. |
| left precuneus                 | 361.433   | 3.930  | ** | -417.038 | 424.423 | n.s. | 46.837 | 5.874  | ** | -250.550    | 621.898 | n.s. |
| left rostralanteriorcingulate  | 329.071   | 3.385  | ** | 150.942  | 365.610 | n.s. | 44.972 | 5.060  | ** | 256.184     | 535.721 | n.s. |
| left rostralmiddlefrontal      | 113.811   | 1.158  | ** | 3.816    | 125.011 | n.s. | 7.655  | 1.730  | ** | 15.972      | 183.176 | n.s. |
| left superiorfrontal           | 541.177   | 5.556  | ** | 1927.368 | 600.057 | **   | 65.054 | 8.304  | ** | -680.175    | 879.250 | n.s. |
| left superiorparietal          | 578.286   | 6.021  | ** | 1700.014 | 650.221 | **   | 74.321 | 8.998  | ** | -1311.611   | 952.755 | n.s. |
| left superiortemporal          | 470.859   | 4.787  | ** | 931.025  | 516.942 | n.s. | 57.562 | 7.154  | ** | 331.895     | 757.464 | n.s. |
| left supramarginal             | 307.760   | 3.214  | ** | 819.335  | 347.036 | *    | 40.690 | 4.803  | ** | 123.558     | 508.504 | n.s. |
| left frontalpole               | 391.464   | 4.081  | ** | 966.018  | 440.730 | *    | 58.784 | 6.099  | ** | -331.182    | 645.792 | n.s. |
| left temporalpole              | 25.400    | 0.265  | ** | 47.772   | 28.616  | n.s. | 3.224  | 0.396  | ** | -83.854     | 41.930  | n.s. |
| left transversetemporal        | 45.368    | 0.479  | ** | 194.716  | 51.710  | **   | 5.206  | 0.716  | ** | -137.908    | 75.770  | n.s. |
| left insula                    | 56.947    | 0.594  | ** | -7.686   | 64.171  | n.s. | 6.788  | 0.888  | ** | -6.444      | 94.028  | n.s. |
| right bankssts                 | 164.356   | 1.842  | ** | -399.121 | 198.942 | *    | 16.907 | 2.753  | ** | 164.981     | 291.506 | n.s. |
| right caudalanteriorcingulate  | 107.054   | 1.139  | ** | 374.190  | 122.986 | **   | 13.963 | 1.702  | ** | -141.376    | 180.209 | n.s. |
| right caudalmiddlefrontal      | 114.635   | 1.199  | ** | -319.007 | 129.509 | *    | 14.718 | 1.792  | ** | 67.915      | 189.767 | n.s. |
| right cuneus                   | 288.838   | 2.933  | ** | 364.976  | 316.703 | n.s. | 30.420 | 4.383  | ** | -269.229    | 464.058 | n.s. |
| right entorhinal               | 152.670   | 1.657  | ** | -4.937   | 178.965 | n.s. | 16.423 | 2.477  | ** | 430.922     | 262.233 | n.s. |
| right fusiform                 | 57.903    | 0.641  | ** | 149.574  | 69.216  | *    | 10.349 | 0.958  | ** | 60.903      | 101.421 | n.s. |
| right inferiorparietal         | 294.737   | 2.995  | ** | 1058.200 | 323.467 | **   | 32.896 | 4.476  | ** | 100.632     | 473.969 | n.s. |
| right inferiortemporal         | 506.192   | 5.248  | ** | 1296.520 | 566.710 | *    | 81.216 | 7.843  | ** | -1318.390   | 830.387 | n.s. |
| right isthmuscingulate         | 326.198   | 3.322  | ** | 1526.453 | 358.727 | **   | 29.511 | 4.964  | ** | -78.652     | 525.635 | n.s. |
| right lateraloccipital         | 105.916   | 1.158  | ** | -81.030  | 125.054 | n.s. | 16.020 | 1.731  | ** | -82.175     | 183.240 | n.s. |
| right lateralorbitofrontal     | 437.115   | 4.538  | ** | 27.875   | 490.026 | n.s. | 57.833 | 6.782  | ** | -959.819    | 718.025 | n.s. |
| right lingual                  | 220.136   | 2.285  | ** | 585.537  | 246.770 | *    | 24.988 | 3.415  | ** | 106.253     | 361.586 | n.s. |
| right medialorbitofrontal      | 289.218   | 3.000  | ** | 70.565   | 323.929 | n.s. | 34.006 | 4.483  | ** | -705.531    | 474.646 | n.s. |
| right middletemporal           | 154.044   | 1.565  | ** | 530.659  | 169.031 | **   | 15.954 | 2.339  | ** | -334.799    | 247.678 | n.s. |
| right parahippocampal          | 308.652   | 3.167  | ** | 1826.197 | 342.056 | **   | 35.701 | 4.734  | ** | -843.985    | 501.208 | n.s. |
| right paracentral              | 69.859    | 0.780  | ** | 147.856  | 84.229  | n.s. | 12.062 | 1.166  | ** | -6.834      | 123.418 | n.s. |
| right parsopercularis          | 156.203   | 1.670  | ** | -499.921 | 180.338 | **   | 25.403 | 2.496  | ** | 541.736     | 264.245 | n.s. |
| right parsorbitalis            | 174.711   | 1.870  | ** | 50.267   | 201.936 | n.s. | 25.558 | 2.795  | ** | 38.219      | 295.892 | n.s. |
| right parstriangularis         | 77.382    | 0.794  | ** | 363.966  | 85.693  | **   | 7.429  | 1.186  | ** | -146.078    | 125.564 | n.s. |
| right pericalcarine            | 184.815   | 1.887  | ** | 262.275  | 203.816 | n.s. | 21.655 | 2.821  | ** | 94.098      | 298.647 | n.s. |
| right postcentral              | 184.562   | 1.820  | ** | 86.236   | 196.575 | n.s. | 13.005 | 2.720  | ** | -583.514    | 288.038 | n.s. |
| right posteriorcingulate       | 331.128   | 3.494  | ** | -256.202 | 377.343 | n.s. | 43.218 | 5.222  | ** | -322.962    | 552.913 | n.s. |
| right precentral               | 133.855   | 1.413  | ** | 118.978  | 152.606 | n.s. | 14.929 | 2.112  | ** | 61.943      | 223.610 | n.s. |
| right precuneus                | 373.987   | 4.130  | ** | 254.919  | 446.051 | n.s. | 53.178 | 6.173  | ** | -1474.581   | 653.589 | n.s. |
| right rostralanteriorcingulate | 355.954   | 3.689  | ** | 491.740  | 398.397 | n.s. | 42.230 | 5.513  | ** | -70.807     | 583.762 | n.s. |
| right rostralmiddlefrontal     | 97.209    | 1.006  | ** | -322.561 | 108.606 | **   | 10.462 | 1.503  | ** | 194.938     | 159.138 | n.s. |
| right superiorfrontal          | 562.107   | 5.703  | ** | 1950.479 | 615.924 | **   | 62.001 | 8.524  | ** | -562.373    | 902.501 | n.s. |
| right superiorparietal         | 586.732   | 6.069  | ** | 1396.682 | 655.391 | *    | 73.254 | 9.070  | ** | 99.951      | 960.330 | n.s. |
| right superiortemporal         | 453.249   | 4.721  | ** | 768.519  | 509.852 | n.s. | 49.896 | 7.056  | ** | -407.728    | 747.076 | n.s. |
| right supramarginal            | 281.280   | 2.903  | ** | 608.371  | 313.474 | n.s. | 31.507 | 4.338  | ** | -694.847    | 459.327 | n.s. |
| right frontalpole              | 375.950   | 3.841  | ** | 732.416  | 414.824 | n.s. | 52.182 | 5.741  | ** | -29.682     | 607.832 | n.s. |
| right temporalpole             | 34.365    | 0.353  | ** | -16.406  | 38.079  | n.s. | 2.976  | 0.527  | ** | 48.350      | 55.796  | n.s. |
| right transversetemporal       | 44.135    | 0.457  | ** | 150.427  | 49.340  | **   | 5.188  | 0.683  | ** | 10.036      | 72.297  | n.s. |
| right insula                   | 43.318    | 0.436  | ** | -38.027  | 47.047  | n.s. | 4.407  | 0.651  | ** | 134.689     | 68.938  | n.s. |

Supplementary Table 3C

| Thickness                      | Intercept | (s.e.) | P  | Age2  | (s.e.) | P    | Sex    | (s.e.) | P    | Sex by age2 | (s.e.) | P    |
|--------------------------------|-----------|--------|----|-------|--------|------|--------|--------|------|-------------|--------|------|
| left bankssts                  | 0.084     | 0.001  | ** | 2.320 | 0.095  | **   | 0.005  | 0.001  | **   | 0.066       | 0.135  | n.s. |
| left caudalanteriorcingulate   | 0.141     | 0.001  | ** | 1.885 | 0.156  | **   | 0.003  | 0.002  | n.s. | -0.247      | 0.222  | n.s. |
| left caudalmiddlefrontal       | 0.206     | 0.002  | ** | 2.014 | 0.223  | **   | -0.005 | 0.003  | n.s. | 0.158       | 0.317  | n.s. |
| left cuneus                    | 0.124     | 0.001  | ** | 1.968 | 0.140  | **   | 0.005  | 0.002  | **   | 0.366       | 0.198  | n.s. |
| left entorhinal                | 0.111     | 0.001  | ** | 1.243 | 0.125  | **   | 0.003  | 0.002  | n.s. | 0.300       | 0.177  | n.s. |
| left fusiform                  | 0.266     | 0.003  | ** | 1.105 | 0.298  | **   | 0.002  | 0.004  | n.s. | 0.744       | 0.424  | n.s. |
| left inferiorparietal          | 0.116     | 0.001  | ** | 1.049 | 0.131  | **   | 0.002  | 0.002  | n.s. | 0.428       | 0.186  | n.s. |
| left inferiortemporal          | 0.112     | 0.001  | ** | 2.475 | 0.126  | **   | 0.006  | 0.002  | **   | -0.005      | 0.178  | n.s. |
| left isthmuscingulate          | 0.131     | 0.001  | ** | 1.354 | 0.145  | **   | 0.002  | 0.002  | n.s. | 0.112       | 0.205  | n.s. |
| left lateraloccipital          | 0.168     | 0.002  | ** | 2.249 | 0.181  | **   | -0.002 | 0.002  | n.s. | -0.062      | 0.257  | n.s. |
| left lateralorbitofrontal      | 0.099     | 0.001  | ** | 1.086 | 0.111  | **   | 0.005  | 0.001  | **   | 0.336       | 0.158  | n.s. |
| left lingual                   | 0.130     | 0.001  | ** | 2.192 | 0.148  | **   | 0.008  | 0.002  | **   | 0.370       | 0.211  | n.s. |
| left medialorbitofrontal       | 0.102     | 0.001  | ** | 1.786 | 0.115  | **   | 0.002  | 0.001  | n.s. | -0.019      | 0.163  | n.s. |
| left middletemporal            | 0.140     | 0.001  | ** | 2.002 | 0.158  | **   | 0.002  | 0.002  | n.s. | -0.220      | 0.224  | n.s. |
| left parahippocampal           | 0.132     | 0.001  | ** | 1.873 | 0.148  | **   | 0.006  | 0.002  | **   | 0.414       | 0.210  | n.s. |
| left paracentral               | 0.249     | 0.002  | ** | 0.884 | 0.263  | **   | 0.004  | 0.003  | n.s. | 0.709       | 0.373  | n.s. |
| left parsopercularis           | 0.129     | 0.001  | ** | 2.123 | 0.143  | **   | 0.004  | 0.002  | *    | 0.110       | 0.203  | n.s. |
| left parsorbitalis             | 0.127     | 0.001  | ** | 2.030 | 0.139  | **   | 0.006  | 0.002  | **   | -0.150      | 0.198  | n.s. |
| left parstriangularis          | 0.183     | 0.002  | ** | 2.713 | 0.200  | **   | 0.006  | 0.003  | *    | -0.017      | 0.284  | n.s. |
| left pericalcarine             | 0.138     | 0.001  | ** | 2.138 | 0.152  | **   | 0.007  | 0.002  | **   | 0.439       | 0.216  | n.s. |
| left postcentral               | 0.104     | 0.001  | ** | 0.810 | 0.121  | **   | 0.001  | 0.002  | n.s. | 0.196       | 0.171  | n.s. |
| left posteriorcingulate        | 0.099     | 0.001  | ** | 1.541 | 0.111  | **   | 0.005  | 0.001  | **   | 0.312       | 0.157  | n.s. |
| left precentral                | 0.134     | 0.001  | ** | 2.195 | 0.147  | **   | 0.004  | 0.002  | *    | -0.051      | 0.209  | n.s. |
| left precuneus                 | 0.113     | 0.001  | ** | 1.752 | 0.126  | **   | 0.004  | 0.002  | **   | -0.019      | 0.179  | n.s. |
| left rostralanteriorcingulate  | 0.113     | 0.001  | ** | 2.472 | 0.125  | **   | 0.004  | 0.002  | **   | 0.354       | 0.178  | n.s. |
| left rostralmiddlefrontal      | 0.195     | 0.002  | ** | 2.076 | 0.213  | **   | -0.004 | 0.003  | n.s. | 0.088       | 0.302  | n.s. |
| left superiorfrontal           | 0.115     | 0.001  | ** | 2.092 | 0.131  | **   | 0.007  | 0.002  | **   | 0.617       | 0.186  | *    |
| left superiorparietal          | 0.127     | 0.001  | ** | 2.679 | 0.142  | **   | 0.003  | 0.002  | n.s. | 0.265       | 0.202  | n.s. |
| left superiortemporal          | 0.101     | 0.001  | ** | 2.096 | 0.113  | **   | 0.005  | 0.001  | **   | -0.027      | 0.160  | n.s. |
| left supramarginal             | 0.131     | 0.001  | ** | 2.277 | 0.143  | **   | 0.005  | 0.002  | **   | 0.090       | 0.203  | n.s. |
| left frontalpole               | 0.119     | 0.001  | ** | 2.386 | 0.129  | **   | 0.005  | 0.002  | **   | -0.027      | 0.184  | n.s. |
| left temporalpole              | 0.248     | 0.002  | ** | 2.941 | 0.275  | **   | 0.005  | 0.003  | n.s. | 0.335       | 0.391  | n.s. |
| left transversetemporal        | 0.267     | 0.003  | ** | 0.298 | 0.306  | n.s. | 0.006  | 0.004  | n.s. | 1.223       | 0.434  | n.s. |
| left insula                    | 0.184     | 0.002  | ** | 2.050 | 0.200  | **   | 0.000  | 0.003  | n.s. | 0.296       | 0.284  | n.s. |
| right bankssts                 | 0.128     | 0.001  | ** | 1.806 | 0.142  | **   | 0.003  | 0.002  | n.s. | 0.212       | 0.201  | n.s. |
| right caudalanteriorcingulate  | 0.149     | 0.001  | ** | 2.170 | 0.163  | **   | 0.004  | 0.002  | n.s. | -0.116      | 0.231  | n.s. |
| right caudalmiddlefrontal      | 0.188     | 0.002  | ** | 2.080 | 0.206  | **   | -0.005 | 0.003  | *    | -0.227      | 0.292  | n.s. |
| right cuneus                   | 0.124     | 0.001  | ** | 1.943 | 0.136  | **   | 0.003  | 0.002  | n.s. | -0.065      | 0.193  | n.s. |
| right entorhinal               | 0.113     | 0.001  | ** | 1.416 | 0.124  | **   | 0.002  | 0.002  | n.s. | 0.045       | 0.177  | n.s. |
| right fusiform                 | 0.290     | 0.003  | ** | 1.469 | 0.318  | **   | 0.003  | 0.004  | n.s. | 0.460       | 0.452  | n.s. |
| right inferiorparietal         | 0.116     | 0.001  | ** | 1.602 | 0.131  | **   | 0.002  | 0.002  | n.s. | 0.178       | 0.186  | n.s. |
| right inferiortemporal         | 0.113     | 0.001  | ** | 2.722 | 0.127  | **   | 0.007  | 0.002  | **   | 0.056       | 0.180  | n.s. |
| right isthmuscingulate         | 0.128     | 0.001  | ** | 1.380 | 0.144  | **   | 0.004  | 0.002  | *    | 0.281       | 0.205  | n.s. |
| right lateraloccipital         | 0.164     | 0.002  | ** | 2.094 | 0.177  | **   | -0.001 | 0.002  | n.s. | -0.040      | 0.252  | n.s. |
| right lateralorbitofrontal     | 0.104     | 0.001  | ** | 1.331 | 0.116  | **   | 0.007  | 0.001  | **   | 0.599       | 0.164  | *    |
| right lingual                  | 0.135     | 0.001  | ** | 2.002 | 0.153  | **   | 0.005  | 0.002  | **   | 0.034       | 0.218  | n.s. |
| right medialorbitofrontal      | 0.105     | 0.001  | ** | 1.756 | 0.117  | **   | 0.001  | 0.001  | n.s. | 0.186       | 0.167  | n.s. |
| right middletemporal           | 0.148     | 0.001  | ** | 1.745 | 0.167  | **   | 0.005  | 0.002  | *    | 0.194       | 0.236  | n.s. |
| right parahippocampal          | 0.127     | 0.001  | ** | 1.952 | 0.142  | **   | 0.006  | 0.002  | **   | 0.103       | 0.202  | n.s. |
| right paracentral              | 0.208     | 0.002  | ** | 1.224 | 0.230  | **   | 0.005  | 0.003  | n.s. | -0.332      | 0.326  | n.s. |
| right parsopercularis          | 0.126     | 0.001  | ** | 1.900 | 0.139  | **   | 0.004  | 0.002  | *    | 0.355       | 0.197  | n.s. |
| right parsorbitalis            | 0.134     | 0.001  | ** | 1.732 | 0.145  | **   | 0.002  | 0.002  | n.s. | -0.161      | 0.205  | n.s. |
| right parstriangularis         | 0.179     | 0.002  | ** | 2.199 | 0.196  | **   | 0.004  | 0.002  | n.s. | 0.389       | 0.278  | n.s. |
| right pericalcarine            | 0.135     | 0.001  | ** | 1.844 | 0.147  | **   | 0.001  | 0.002  | n.s. | -0.122      | 0.208  | n.s. |
| right postcentral              | 0.105     | 0.001  | ** | 0.793 | 0.120  | **   | 0.002  | 0.002  | n.s. | 0.050       | 0.171  | n.s. |
| right posteriorcingulate       | 0.105     | 0.001  | ** | 1.942 | 0.118  | **   | 0.001  | 0.001  | n.s. | 0.118       | 0.167  | n.s. |
| right precentral               | 0.133     | 0.001  | ** | 2.117 | 0.146  | **   | 0.000  | 0.002  | n.s. | 0.109       | 0.207  | n.s. |
| right precuneus                | 0.113     | 0.001  | ** | 1.694 | 0.127  | **   | 0.005  | 0.002  | **   | 0.133       | 0.181  | n.s. |
| right rostralanteriorcingulate | 0.113     | 0.001  | ** | 2.499 | 0.125  | **   | 0.005  | 0.002  | **   | 0.244       | 0.178  | n.s. |
| right rostralmiddlefrontal     | 0.188     | 0.002  | ** | 1.992 | 0.212  | **   | 0.008  | 0.003  | **   | -0.059      | 0.301  | n.s. |
| right superiorfrontal          | 0.113     | 0.001  | ** | 1.736 | 0.130  | **   | 0.005  | 0.002  | **   | 0.250       | 0.184  | n.s. |
| right superiorparietal         | 0.125     | 0.001  | ** | 2.589 | 0.139  | **   | 0.004  | 0.002  | *    | 0.117       | 0.197  | n.s. |
| right superiortemporal         | 0.103     | 0.001  | ** | 1.986 | 0.115  | **   | 0.004  | 0.001  | **   | 0.361       | 0.164  | n.s. |
| right supramarginal            | 0.128     | 0.001  | ** | 2.116 | 0.141  | **   | 0.007  | 0.002  | **   | 0.191       | 0.201  | n.s. |
| right frontalpole              | 0.121     | 0.001  | ** | 2.782 | 0.133  | **   | 0.005  | 0.002  | **   | 0.020       | 0.189  | n.s. |
| right temporalpole             | 0.243     | 0.002  | ** | 2.417 | 0.269  | **   | 0.003  | 0.003  | n.s. | 0.592       | 0.382  | n.s. |
| right transversetemporal       | 0.274     | 0.003  | ** | 0.825 | 0.323  | *    | 0.003  | 0.004  | n.s. | 1.082       | 0.459  | n.s. |
| right insula                   | 0.183     | 0.002  | ** | 1.833 | 0.203  | **   | 0.010  | 0.003  | **   | 0.211       | 0.288  | n.s. |
