# Supplementary material for: Greater male than female variability in regional brain structure across the lifespan
Source: PubMed Central journal article supplement (PMC8675415; doi:10.1002/hbm.25204), 2020-10-12

Subcortical

Area

Thickness

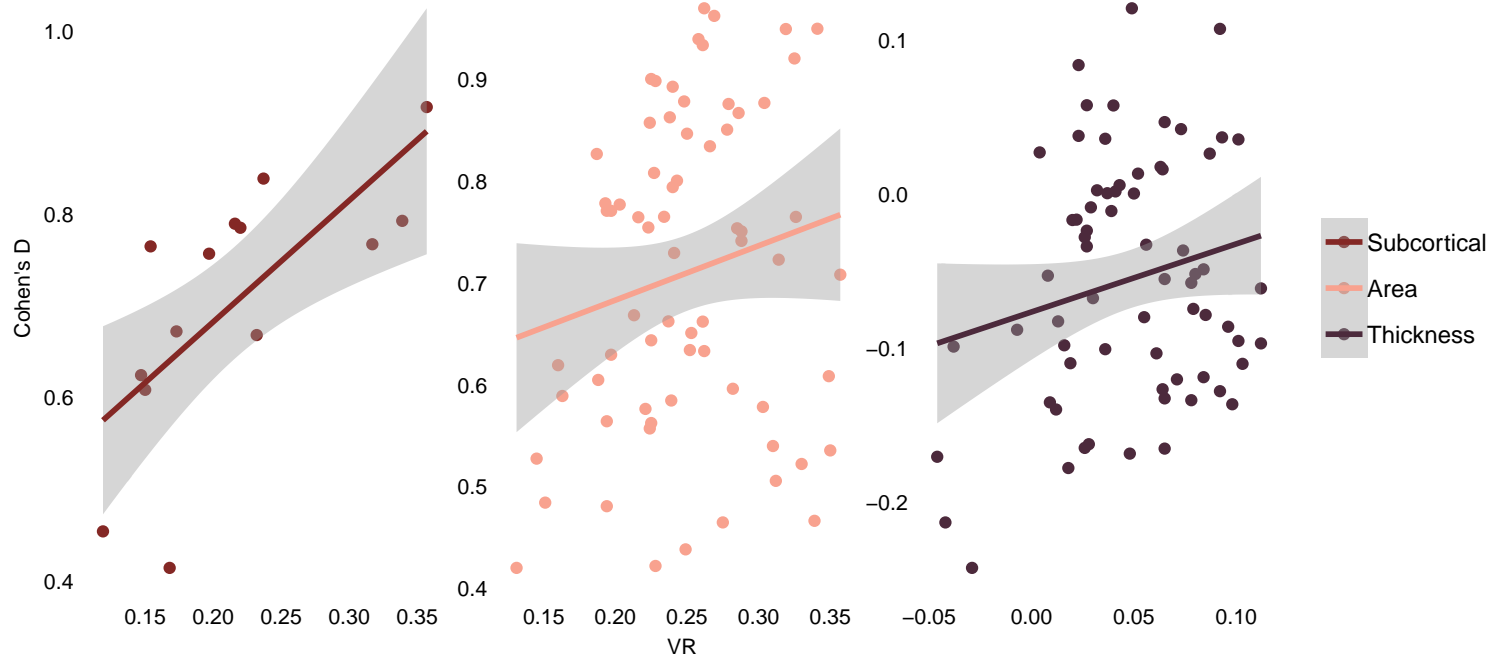

Supplement: HBM-43-470-s004.pdf [file HBM-43-470-s004.pdf]
