# Supplementary material for: Greater male than female variability in regional brain structure across the lifespan
Source: PubMed Central journal article supplement (PMC8675415; doi:10.1002/hbm.25204), 2020-10-12
Supplement: HBM-43-470-s006.pdf [file HBM-43-470-s006.pdf]

**Supplemental Table 1.** Screening Process and Eligibility Criteria, Scanner, Image Acquisition Parameters and Image Segmentation Software

| Sample               | Screening Process  | Eligibility Criteria                                                                                                                                                                                                                         | Magnet strength/<br>Scanner Vendor  | Acquisition parameters                                                                                                                     | Freesurfer version |
|----------------------|--------------------|----------------------------------------------------------------------------------------------------------------------------------------------------------------------------------------------------------------------------------------------|-------------------------------------|--------------------------------------------------------------------------------------------------------------------------------------------|--------------------|
| <b>ADHD-NF</b>       | KSADS              | No head trauma, no neurological and psychiatric history, no lifetime alcohol or substance abuse, no previous or current use of psychotropic medication, IQ>75.                                                                               | 3T Siemens Tim Trio                 | T1-weighted 3D MPRAGE;<br>TR/TE/TI/FA=2300ms/3030ms/900ms/9°;<br>Image matrix= 256 × 256; 192 sagittal slices; voxel size=1mm <sup>3</sup> | 5.3                |
| <b>AMC</b>           | Personal Interview | No head trauma, no medical, neurological or psychiatric history, no lifetime alcohol or substance abuse, no previous or current use of psychotropic medication, IQ>75. No history of any psychiatric disorders in 1st degree family members. | 3T Philips Intera                   | T1-weighted 3D MPRAGE; TE range= 3.5-4.6ms, TR range= 9-9.663ms, FA=                                                                       | 5.1                |
| <b>Basel</b>         | Personal Interview | No head trauma, no medical, neurological, or psychiatric history, no alcohol or substance abuse ever, no previous or current use of psychotropic medication, IQ>75. No history of any psychiatric disorders in 1st degree family members.    | 3T Siemens                          | T1-weighted MPRAGE; TR/TE/TI/FA= 2000 ms/3.37 ms/1000 ms/8°; image matrix= 256×256x160; voxel size=1x1x1 mm <sup>3</sup> ; sagittal plane  | 6.0                |
| <b>Betula</b>        | Personal Interview | No head trauma, no medical, neurological or psychiatric history, no lifetime alcohol or substance abuse, no previous or current use of psychotropic medication.                                                                              | 3T General Electric Discovery MR750 | T1-weighted MPRAGE;<br>TR/TE/TI/FA=8.1240 ms/3.2000 ms/450ms/ 12°; image matrix = 256x256                                                  | 5.3                |
| <b>Barcelona (1)</b> | KSADS              | No head trauma, no medical, neurological or psychiatric history, no lifetime alcohol or substance abuse, no previous or current use of psychotropic medication, IQ>75. No history of any psychiatric disorders in 1st degree family members. | 1.5 T General Electric Signa        | T1-weighted; image matrix = 256 x 256; 128 slices; voxel size 1 x 1 x 1 mm <sup>3</sup> .                                                  | 5.3                |
| <b>Barcelona (2)</b> | KSADS              | No head trauma, no medical, neurological or psychiatric history, no lifetime alcohol or substance abuse, no previous or current use of psychotropic medication, IQ>75. No history of any psychiatric disorders in 1st degree family members. | 3 T Siemens MAGNETOM TIM Trio       | T1-weighted; image matrix = 256 x 256; 240 slices; voxel size 1 x 1 x 1 mm <sup>3</sup> .                                                  | 5.3                |

|                   |                                       |                                                                                                                                                                                                                                                                 |                                                                         |                                                                                                                                                                        |     |
|-------------------|---------------------------------------|-----------------------------------------------------------------------------------------------------------------------------------------------------------------------------------------------------------------------------------------------------------------|-------------------------------------------------------------------------|------------------------------------------------------------------------------------------------------------------------------------------------------------------------|-----|
| <b>BIG</b>        | Questionnaire for psychiatric history | No head trauma, no medical, neurological or psychiatric history, no lifetime alcohol or substance abuse, no previous or current use of psychotropic medication, IQ>70. No history of any psychiatric disorders in 1st or 2 <sup>nd</sup> degree family members. | 1,5 T Siemens Sonata and Avanto and 3 T Siemens Trio, TimTrio and Skyra | T1-weighted 3D MPRAGE; TR/TE/TI/sagittal slices = 1940-2730 ms/850-110 ms/2.92-4.58 ms; 176-192 sagittal slices; voxel size= 1.0x1.0x1.0 mm <sup>3</sup>               | 5.3 |
| <b>Bonn</b>       | Personal interview                    | No head trauma, no medical, neurological or psychiatric history, no previous or current use of psychotropic medication.                                                                                                                                         | 3T Siemens Trio                                                         | TR/TE/FA= 1570-1660ms/2.75-3.42ms/8-9°                                                                                                                                 | NA  |
| <b>Bordeaux</b>   | Personal interview                    | No head trauma, no previous or current use of psychotropic medication, IQ>75.                                                                                                                                                                                   | 3T Phillips Achieva                                                     | T1-weighted 3D TFE; TR/TE/TI/FA= 20 ms/4.6 ms/800 ms/10°; image matrix = 256x256x180mm <sup>3</sup> ; voxel size=1mm <sup>3</sup>                                      | 5.3 |
| <b>BrainSCALE</b> | Personal interview                    | No head trauma, no medical, neurological or psychiatric history, no lifetime alcohol or substance abuse, no previous or current use of psychotropic medication.                                                                                                 | 1.5T Philips Achieva                                                    | T1-weighted 3D SPGR; TR/TE/ FA= 30 ms/4.6 ms/30°; image matrix=256x256; 160–180 contiguous coronal slices; voxel size=1 x 1 x 1.2 mm <sup>3</sup>                      | 5.1 |
| <b>BRCATLAS</b>   | Telephone interview                   | No head trauma, no medical, neurological or psychiatric history, no lifetime alcohol or substance abuse, no mild cognitive impairment, no previous or current use of psychotropic medication, IQ>75.                                                            | 3T General Electric Signa HDx                                           | T1 weighted: TR/TE/TI/FA= 6.9 ms/2.8 ms/650 ms/8°; image matrix = 256x256x180mm <sup>3</sup> ; voxel size=1mm <sup>3</sup> ; sagittal plane acquisition                | 5.3 |
| <b>CAMH</b>       | SCID                                  | No head trauma, no neurological or psychiatric history, no alcohol or substance abuse preceding 6 months, no previous or current use of psychotropic medication, IQ>75. No history of any psychotic disorders in 1st degree family members.                     | GE 1.5 T (echospeed)                                                    | 124 Axial inversion recovery–prepared spoiled gradient recall images, 1.5-mm-thick slice acquisition TE=5.3ms; TR=12.3ms; time to inversion, 300.0ms; flip angle, 20°. | 5.3 |
| <b>Cardiff</b>    | MINI                                  | No head trauma, no medical history, including neurological and psychiatric history, no alcohol or substance abuse in the preceding 6 months, no previous or current use of psychotropic medication.                                                             | 3T General Electric Signa                                               | T1-weighted 3D FSPGR; TR/TE/TI/FA=7.9ms/3.0ms/450ms/20°; Image matrix= 256 × 192 x 172; voxel size=1mm <sup>3</sup>                                                    | 5.3 |
| <b>CEG</b>        | Teacher and parent Connors'           | No head trauma, no medical history, including neurological and psychiatric history, no alcohol or substance abuse in the preceding 6 months, no previous or current use of psychotropic medication. IQ>75                                                       | 3T General Electric Signa                                               | T1-weighted 3D SPGR; TR/TE/FA=2000ms/30ms/90°; Image matrix= 128 × 128; 43 slices                                                                                      | 5.3 |

|                             |                    |                                                                                                                                                                                                                                                                                                                                  |                                                         |                                                                                                                                                                                                                       |     |
|-----------------------------|--------------------|----------------------------------------------------------------------------------------------------------------------------------------------------------------------------------------------------------------------------------------------------------------------------------------------------------------------------------|---------------------------------------------------------|-----------------------------------------------------------------------------------------------------------------------------------------------------------------------------------------------------------------------|-----|
| <b>CIAM</b>                 | SCID               | No head trauma or psychiatric history, no previous or current use of psychotropic medication, IQ>75.                                                                                                                                                                                                                             | 3T Siemens Allegra                                      | T1-weighted 3D MPRAGE; TR/TE/TI/FA= 2530 ms/1.53, 3.21, 4.89, 6.57/2.91 ms/ ms/7°; image matrix= 256x256; 128 sagittal slices; voxel size= 1.3x1.0x1.3 mm <sup>3</sup>                                                | 5.3 |
| <b>CLiNG</b>                | Personal Interview | No head trauma, no medical, neurological or psychiatric history, no lifetime alcohol or substance abuse, no previous or current use of psychotropic medication, IQ>75. No history of any psychiatric disorders in 1st degree family members.                                                                                     | 3T Siemens Tim Trio                                     | T1-weighted 3D MPRAGE; TR/TE/TI/FA=2250 ms/3.26 ms/900 ms/9°; image matrix = 256 x 256; 192 sagittal slices; voxel size= 1 mm <sup>3</sup>                                                                            | 5.3 |
| <b>CODE</b>                 | SCID Interview     | No history of or current Axis-1 or 2 disorders, history of or current neurological disorder or brain injury, Serious medical condition, Severe cognitive impairment, Substance-related abuse or dependence disorder, Use of psychotropic medication, Use of central-acting medication, Pregnancy, General MRI contraindications. | 3T Siemens Trio (4 Sites), 3 T Philips Achieva (1 site) | Siemens: T1 mprage, voxel size 1 mm x 1 mm x 1 mm; TR=1900 msec; TE=2.52 msec; Sample 1: 192 slices, Sample 2: 170 slices<br>Philips: T1 3D-TFE, voxel size 1 mm x 1 mm x 1 mm; TR=8.3 msec; TE=3.8 msec; 170 slices. | 5.3 |
| <b>COMPULS/TS EUROTRAIN</b> | KSADS              | No head trauma, no medical, neurological or psychiatric history, no alcohol or substance abuse preceding 6 months, no previous or current use of psychotropic medication, IQ>75. No history of any psychiatric disorders in 1 <sup>st</sup> or 2 <sup>nd</sup> degree family members.                                            | 3T Siemens Tim Trio and Prisma                          | T1-weighted 3D MPRAGE; TR/TE/FA=2300 ms/2.98 ms/9°; image matrix = 256 x 256; 176 sagittal slices; voxel size= 1x1x1.2 mm <sup>3</sup>                                                                                | 5.3 |
| <b>ENIGMA-HIV</b>           | MINI               | No head trauma, no medical, neurological or psychiatric history, no alcohol or substance abuse preceding 6 months, no previous or current use of psychotropic medication, IQ>75. No mild cognitive impairment                                                                                                                    | 3T Siemens Allegra                                      | T1-weighted MPRAGE; TR/TE/TI/FA=2400 ms/2.38 ms/1000 ms/ 8°; 162 slices; voxel size= 1 mm <sup>3</sup>                                                                                                                | 5.1 |
| <b>ENIGMA-OCD (1)</b>       | MINI-Plus          | No head trauma, no medical, neurological or psychiatric history, no lifetime alcohol or substance abuse, no previous or current use of psychotropic medication, IQ>75. No cognitive impairment                                                                                                                                   | 3T Siemens Allegra                                      | T1-weighted 3D MPRAGE; TR/TE/TI/FA=2300 ms/3.93 ms/ 1100 ms/12°; image matrix =256x240; 160 contiguous sagittal slices; voxel size=1.3 x 1 x 1 mm <sup>3</sup>                                                        | 5.3 |

|                       |                                                                             |                                                                                                                                                                                                                                                                                 |                              |                                                                                                                                                   |     |
|-----------------------|-----------------------------------------------------------------------------|---------------------------------------------------------------------------------------------------------------------------------------------------------------------------------------------------------------------------------------------------------------------------------|------------------------------|---------------------------------------------------------------------------------------------------------------------------------------------------|-----|
| <b>ENIGMA-OCD (2)</b> | SCID-I                                                                      | No medical or psychiatric history                                                                                                                                                                                                                                               | 1.5T Siemens Sonata          | T1-weighted 3D MPRAGE; TR/TE/TI/FA=2700 ms/4 ms/ 950 ms/8°; image matrix =256×192; 160 slices; voxel size= 1 mm <sup>3</sup>                      | 5.3 |
| <b>ENIGMA-OCD (3)</b> | SCID-I                                                                      | No medical or psychiatric history                                                                                                                                                                                                                                               | 3T General Electric Signa    | T1-weighted 3D MPRAGE; image matrix =256×256; 172 slices; voxel size= 1x0.977x0.977 mm <sup>3</sup>                                               | 5.3 |
| <b>ENIGMA-OCD (4)</b> | Personal Interview                                                          | No head trauma, no medical, neurological or psychiatric history, no lifetime alcohol or substance abuse, no previous or current use of psychotropic medication, IQ>75.                                                                                                          | 3T Phillips Intera           | T1-weighted 3D MPRAGE; TR/TE/FA=9.69 ms/4.60 ms/8°; image matrix =256×256; 182 slices; voxel size=1 x 1 x 1.2 mm <sup>3</sup>                     | 5.3 |
| <b>ENIGMA-OCD (5)</b> | SCID                                                                        | No head trauma, no neurological or psychiatric history, no lifetime alcohol or substance abuse, no previous or current use of psychotropic medication, IQ>75.                                                                                                                   | 1.5T General Electric Signa  | T1-weighted 3D SPGR; TR/TE/FA= 14.8 ms/ 1.7 ms/ 20°; image matrix= 256 x 256 x 124; voxel size: 0.94 x 0.94 x 1.50 mm                             | 5.3 |
| <b>ENIGMA-OCD (7)</b> | SCID-I/NP                                                                   | No head trauma, no medical, neurological or psychiatric history, no alcohol or substance abuse in the preceding 6 months, no previous or current use of psychotropic medication, IQ>70. No history of any psychiatric disorders in 1st or 2 <sup>nd</sup> degree family members | 1.5 T General Electric Signa | T1-weighted 3D FSPGR; TR/TE/FA=11.8ms/4.2ms/90°; Image matrix= 256 × 256 x 130; voxel size=1.2mm <sup>3</sup>                                     | 5.3 |
| <b>FIDMAG</b>         | Personal interview; structured interview in part of the sample              | No head trauma, no medical, neurological or psychiatric history, no lifetime alcohol or substance abuse, no previous or current use of psychotropic medication, IQ>70.                                                                                                          | 1.5 T General Electric Signa | T1-weighted MPRAGE; TR/TE/FA=2000 ms/4 ms/ 9°; image matrix=512 x 512; 180 contiguous sagittal slices; voxel size=0.56 x 0.56 x 1 mm <sup>3</sup> | 5.3 |
| <b>GSP</b>            | Structured phone screen and study specific self-report battery and clinical | No head trauma, no medical, neurological or psychiatric history, no lifetime alcohol or substance abuse, no current use of psychotropic medication, normal brain anatomy following brain scan.                                                                                  | 3T Siemens Tim Trio          | T1-weighted 3D multi-echo MPRAGE; TR/TE/TI/FA =2200 ms/1.54-7 ms/ 1100/7 °; voxel size=1.2x1.2x1.2 mm                                             | 4.5 |

|                         |                                         |                                                                                                                                                                                                                                              |                                                                                             |                                                                                                                                                                                               |     |
|-------------------------|-----------------------------------------|----------------------------------------------------------------------------------------------------------------------------------------------------------------------------------------------------------------------------------------------|---------------------------------------------------------------------------------------------|-----------------------------------------------------------------------------------------------------------------------------------------------------------------------------------------------|-----|
|                         | screen                                  |                                                                                                                                                                                                                                              |                                                                                             |                                                                                                                                                                                               |     |
| <b>HUBIN</b>            | SCID-I                                  | No head trauma, no medical, neurological or psychiatric history, no lifetime alcohol or substance abuse, no previous or current use of psychotropic medication, IQ>75. No history of any psychiatric disorders in 1st degree family members. | 1.5 T General Electric Signa                                                                | T1-weighted SPGR; TR/TE/FA= 24 ms/6 ms/35 °; 124 coronal slices; voxel size 0.86 x 0.86 x 1.50 mm <sup>3</sup> .                                                                              | 5.3 |
| <b>HMS</b>              | Personal Interview                      | No head trauma, no medical, neurological or psychiatric history, no lifetime alcohol or substance abuse, no previous or current use of psychotropic medication, IQ>75. No history of any psychiatric disorders in 1st degree family members. | 1.5T Siemens Magnetom Sonata                                                                | T1-weighted 3D MPRAGE; TR/TE/TI/FA=1900 ms/4.0 ms/700 ms/15°; image matrix = 256 x 256; 176 consecutive sagittal slices; voxel size=1 mm <sup>3</sup>                                         | 5.3 |
| <b>IDIVAL (1) + (2)</b> | CASH                                    | No head trauma, no medical, neurological or psychiatric history, no lifetime alcohol or substance abuse, no previous or current use of psychotropic medication, IQ>75. No history of any psychiatric disorders in 1st degree family members. | 3T Siemens Alegria, Phillips Achieva<br>1.5T General Electric Signa                         | T1-weighted SPGR; TR/TE/FA=24 ms/5 ms/ 5°; image matrix=256x192; T1-weighted SPGR; TR/TE/FA=3000 ms/3.9 ms/8°; image matrix=256x256; voxel size=1mm <sup>3</sup> ; sagittal plane acquisition | 5.3 |
| <b>IDIVAL (3)</b>       | Personal Interview                      | No lifetime history of Axis I psychiatric disorders, no mild cognitive                                                                                                                                                                       | 3T Phillips Achieva                                                                         | T1-weighted SPGR; TR/TE/FA=3000 ms/4.6 ms/8°; image matrix=321x312; voxel size=1mm <sup>3</sup> ; sagittal plane acquisition                                                                  | 5.3 |
| <b>IMAGEN</b>           | DAWBA questionnaire clinician interview | No head trauma, no medical, neurological or psychiatric history, no previous or current use of psychotropic medication. IQ>75                                                                                                                | 3T Siemens Verio and TimTrio, Philips Achieva, General Electric Signa Excite, and Signa HDx | T1-weighted 3D MPRAGE; TR/TE/TI/FA=2300ms/3030ms/900ms/9°; Image matrix= 256 × 256;192 sagittal slices; voxel size=1mm <sup>3</sup>                                                           | 5.3 |
| <b>IMH</b>              | SCID-I/NP                               | No head trauma, no medical history, neurological or psychiatric history, no lifetime alcohol or substance abuse, as well as no previous or current use of psychotropic medication, IQ>75. No cognitive impairment                            | 3T Phillips Achieva                                                                         | T1-weighted 3D MPRAGE; TR/TE/FA= 7.2ms/ 3.8ms/8°; image matrix=256 x 256; 180 axial slices; voxel size=0.9mm <sup>3</sup>                                                                     | 5.3 |

|                      |                                                  |                                                                                                                                                                                                                                                                                  |                                        |                                                                                                                                                                 |     |
|----------------------|--------------------------------------------------|----------------------------------------------------------------------------------------------------------------------------------------------------------------------------------------------------------------------------------------------------------------------------------|----------------------------------------|-----------------------------------------------------------------------------------------------------------------------------------------------------------------|-----|
| <b>ImpACT</b>        | SCID-I (and SCID-II)                             | No head trauma, no medical, neurological or psychiatric history, no alcohol or substance abuse in the preceding 6 months, no previous or current use of psychotropic medication, IQ>70. No history of any psychiatric disorders in 1st or 2 <sup>nd</sup> degree family members. | 1.5 T Siemens                          | T1-weighted 3D-MPRAGE; TR/TE/TI/FA =2730 ms/2.95 ms/1000 ms; 176 consecutive sagittal slices; voxel size= 1 mm <sup>3</sup>                                     | 5.3 |
| <b>Indiana (1)</b>   | Personal Interview                               | No head trauma, no medical, neurological or psychiatric history, no lifetime alcohol or substance abuse, no previous or current use of psychotropic medication, IQ>75.                                                                                                           | 1.5T General Electric Signa Horizon LX | T1-weighted 3D SPGR; TR/TE/FA=25 ms/3 ms/ 45°; image matrix= 256 x 256; 124 contiguous coronal slices                                                           | 5.1 |
| <b>Indiana (2)</b>   | Personal interview<br>Structured<br>phone screen | No head trauma, no medical, neurological or psychiatric history, no alcohol or substance abuse in the preceding 6 months, no previous or current use of psychotropic medication, IQ>75.                                                                                          | 3T Siemens Magnetom TrioTim            | T1-weighted MPRAGE; TR/TE/FA=2300 ms/2.95 ms/ 9°; image matrix=256 x 240; 176 contiguous sagittal slices                                                        | 5.1 |
| <b>Indiana (3)</b>   | Personal interview<br>Structured<br>phone screen | No head trauma, no medical, neurological or psychiatric history, no alcohol or substance abuse in the preceding 6 months, no previous or current use of psychotropic medication, IQ>75.                                                                                          | 3T Siemens Skyra                       | T1-weighted MPRAGE GRAPPA2; TR/TE/FA=2300 ms/2.91 ms/ 9°; image matrix=256 x 240; 160 contiguous sagittal slices                                                | 5.1 |
| <b>Johns Hopkins</b> | Personal Interview                               | No head trauma, no medical, neurological or psychiatric history, no alcohol or substance abuse preceding 6 months, never prescribed with psychotropic medication, IQ>75. No mild cognitive impairment                                                                            | 1.5T General Electric Signa            | T1-weighted SPGR; TR/TE/FA=35 ms/5 ms/ 45°; image matrix=256x256; 124 slices                                                                                    | 5.3 |
| <b>KaSP</b>          | MINI                                             | No head trauma, no medical, neurological or psychiatric history, no lifetime alcohol or substance abuse, no previous or current use of psychotropic medication, IQ>75. No history of any psychiatric disorders in 1 <sup>st</sup> or 2 <sup>nd</sup> degree family members.      | 3T General Electric                    | T1-weighted SPGR; TR/TI/FA=7.904 ms/450 ms/12 °; image matrix= 256 x 256 mm <sup>3</sup> ; 145 sagittal slices ; voxel size=0.934 x 0.934 x 1.2 mm <sup>3</sup> | 5.3 |
| <b>Leiden</b>        | Self-report                                      | No psychiatric or neurological disorders, no use of psychotropic medications                                                                                                                                                                                                     | 3T Philips Achieva                     | T1-weighted 3D SPGR; TR/TE = 9.76 ms/4.59 ms; image matrix=256x256; 160–180 contiguous coronal slices; voxel size=0.875x 0.875 x 1.2 mm <sup>3</sup>            | 5.3 |

|                       |                              |                                                                                                                                                                                                                                |                                                                                                                    |                                                                                                                                                      |     |
|-----------------------|------------------------------|--------------------------------------------------------------------------------------------------------------------------------------------------------------------------------------------------------------------------------|--------------------------------------------------------------------------------------------------------------------|------------------------------------------------------------------------------------------------------------------------------------------------------|-----|
| <b>MCIC (1) + (2)</b> | SCID, SCID-I/NP, CASH        | No head trauma, no medical, neurological or psychiatric history, no lifetime alcohol or substance abuse, no previous or current use of psychotropic medication, IQ>75.                                                         | 1.5T Siemens Sonata-3T Siemens Trio                                                                                | T1-weighted MPRAGE sequence; TR/TE/TI/FA=2530 ms/4.76 ms/1100 ms/20°; image matrix=256×256×128 cm; voxel size=0.625 mm <sup>3</sup>                  | 5.3 |
| <b>Meth-CT</b>        | SCID DSM-IV                  | No head trauma, no medical, neurological or psychiatric history, no lifetime alcohol or substance abuse, no previous or current use of psychotropic medication, IQ>70.                                                         | 3T Siemens Allegra                                                                                                 | T1-weighted 3D MPRAGE; TR/graded TE/FA=2530 ms/ 1.53, 3.21, 4.89, 6.57 ms/ 7°; 160 contiguous sagittal slices; voxel size=1 x 1 *x 1 mm <sup>3</sup> | 5.3 |
| <b>MHRC</b>           | Personal interview           | No head trauma, no medical history, including neurological and psychiatric history. No Family History of neurological or psychiatric disorders                                                                                 | 3T Philips Achieva                                                                                                 | T1-weighted TFE; TR/TE/FA=8.2ms/3.7ms/8°; voxel size=0.83 x 0.83 x 1 mm <sup>3</sup>                                                                 | 5.3 |
| <b>Muenster</b>       | SCID                         | No head trauma, no medical, neurological or psychiatric history, no lifetime alcohol or substance abuse, no previous or current use of psychotropic medication, IQ>75.                                                         | 3T Phillips Intera                                                                                                 | T1 weighted TFE: TR/TE/FA= 7.4 ms/3.4 ms/9°; image matrix = 256x204x160mm <sup>3</sup> ; voxel size=0.5mm <sup>3</sup> ; sagittal plane acquisition  | 5.3 |
| <b>NESDA</b>          | CIDI                         | No lifetime history of Axis-I diagnoses, no lifetime medical or neurological morbidity including hypertension, no lifetime substance dependence, no substance abuse in the preceding year, no medication use.                  | 3T Philips Achieva SENSE-6 to 8 channel head coil                                                                  | T1-weighted 3D MPRAGE; TR/TE/FA= 9 ms/3.5 ms/8°; image matrix=256x256; 170 sagittal slices; voxel size=1mm <sup>3</sup>                              | 5.0 |
| <b>NeuroIMAGE</b>     | KSADS-PL                     | No head trauma, no mild cognitive impairment, neurological or psychiatric history, no previous or current use of psychotropic medication, IQ>75. No history of any psychiatric disorders in 1st and 2nd degree family members. | 1.5 T Siemens AVANTO (Donders Centre for Cognitive Neuroimaging)<br>1.5 T Siemens SONATA (VU University Amsterdam) | MPRAGE 176 sagittal slices, repetition time=2,730ms, echo time=2.95ms, voxel size=1.0x1.0x1.0mm, field of view=256 mm                                | 5.3 |
| <b>Neuroventure</b>   | DAWBA and BSI                | No head trauma, no medical, neurological or psychiatric history, no lifetime alcohol or substance abuse, no previous or current use of psychotropic medication, IQ>75.                                                         | 3T SIEMENS TrioTim                                                                                                 | T1-weighted 3D MPRAGE; TR/TE/ FA= 2300 ms/2.96 ms/9°; image matrix= 256x256; voxel size= 1.0x1.0x1.0 mm <sup>3</sup>                                 | 5.3 |
| <b>NTR (1)</b>        | MINI, BDI, STAI, STAS, YBOCS | No head trauma, no previous or current use of psychotropic medication, normal IQ.                                                                                                                                              | 3T Philips Intera                                                                                                  | T1-weighted 3D MPRAGE; TR/TE/FA=9.64 ms/4.60 ms/8 °; image matrix=256 x 256; 182 coronal slices; voxel size=1 x1x1.2 mm <sup>3</sup>                 | 5.1 |

|                   |                        |                                                                                                                                                                                                                                              |                                                                                                   |                                                                                                                                                        |     |
|-------------------|------------------------|----------------------------------------------------------------------------------------------------------------------------------------------------------------------------------------------------------------------------------------------|---------------------------------------------------------------------------------------------------|--------------------------------------------------------------------------------------------------------------------------------------------------------|-----|
| <b>NTR (2)</b>    | CIDI, MADRS, BDI, STAI | No current psychiatric disorder, no current use of psychotropic medication, normal IQ.                                                                                                                                                       | 1.5 T Siemens Sonata                                                                              | T1-weighted 3D MPRAGE; TR/TE/TI/FA= 15 ms/7 ms/300 ms/8°; image matrix=256x176; 160 coronal slices; voxel size=1x1x1.5 mm <sup>3</sup>                 | 5.1 |
| <b>NTR (3)</b>    | DISC-IV                | No head trauma, no medical, neurological or psychiatric history, no lifetime alcohol or substance abuse, no mild cognitive impairment, no previous or current use of psychotropic medication, IQ>75.                                         | 1.5T Siemens Sonata                                                                               | T1-weighted 3D MPRAGE; TR/TE/TI/FA=1900 ms/3.93 ms/1100 ms/15°; image matrix=256 x 224; 160 sagittal slices; voxel size=1 mm <sup>3</sup>              | 5.1 |
| <b>NU</b>         | SCID                   | No head trauma, no medical, neurological or psychiatric history, no lifetime alcohol or substance abuse, no previous or current use of psychotropic medication, IQ>75. No history of any psychiatric disorders in 1st degree family members. | 1.5T SIEMENS Vision                                                                               | T1-weighted 3D MPRAGE; TR/TE/TI/FA=2200 ms/4.13 ms/766 ms/13°; voxel size =0.8mm <sup>3</sup> ; axial plane acquisition.                               | 5.3 |
| <b>NUIG</b>       | SCID                   | No history of head trauma or injury; No family history of ANY psychiatric disorders in 1st degree family members; IQ>75                                                                                                                      | 1.5T Siemens Magnetom Symphony                                                                    | T1-weighted 3D MPRAGE; TR/TE=1140/4.38 mm<br>Image matrix = 256x256; FOV=230mm; voxel size: 0.45x0.45x0.9mm                                            | 5.1 |
| <b>NYU</b>        | SCID-NP for DSM-IV     | No head trauma, no medical history, including neurological and psychiatric history, no lifetime alcohol or substance abuse, no previous or current use of psychotropic medication. IQ>75.                                                    | 3T Siemens Allegra                                                                                | T1-weighted 3D MPRAGE; TR/TE/TI/FA=2530ms/3.25ms/1100ms/7°                                                                                             | 5.3 |
| <b>OATS (1-4)</b> | Personal interview     | No head trauma, no current diagnosis of a psychotic disorder, no neurological disorder, no malignancy (other than skin cancer) or other severe medical comorbidity, no mild cognitive impairment, IQ>75.                                     | 1.5T Philips Gyroscan, Siemens Magnetom Avanto, Siemens Sonata; 3T Philips Achieva Quasar Dual, a | T1-weighted 3D acquisition; TR/TE/TI/FA=15370 ms/3.24 ms/780 ms/8°; 144 slices; voxel size=1 x 1 x 1.5 mm <sup>3</sup>                                 | 5.3 |
| <b>OLIN</b>       | SCID I                 | No head trauma, no medical, neurological or psychiatric history, no alcohol or substance abuse preceding 6 months, never prescribed with psychotropic medication, IQ>75.                                                                     | 3T Siemens Alegra                                                                                 | T1-weighted 3D MPRAGE; TR/TE/TI/FA= 2300 ms/2.91 ms/900 ms/9°; image matrix= 256x240x192; 160 sagittal slices; voxel size= 1.0x1.0x1.2 mm <sup>3</sup> | 5.1 |
| <b>QTIM</b>       | CIDI                   | No head trauma, no medical history, neurological and psychiatric history, no alcohol or substance abuse in the preceding 6                                                                                                                   | 4T Bruker                                                                                         | T1-weighted 3D MPRAGE: TR/TE/TI/FA = 1500 ms/3.35 ms/ 700 ms/ 8°; image matrix= 256 × 256 × 256 or 256 × 256 ×                                         | 5.1 |



|                    |                  |                                                                                                                                                                                                                                              |                                    |                                                                                                                                                                                                |                                     |
|--------------------|------------------|----------------------------------------------------------------------------------------------------------------------------------------------------------------------------------------------------------------------------------------------|------------------------------------|------------------------------------------------------------------------------------------------------------------------------------------------------------------------------------------------|-------------------------------------|
|                    |                  | months, no antidepressant medication or medication affecting cognition.                                                                                                                                                                      |                                    | 240; 256 coronal slices; voxel size= 0.9 mm <sup>3</sup>                                                                                                                                       |                                     |
| <b>Oxford</b>      | KSADS            | No head trauma, no medical, neurological or psychiatric history, no lifetime alcohol or substance abuse, no previous or current use of psychotropic medication, IQ>75.                                                                       | 1.5T Siemens Sonata                | T1-weighted 3D MPRAGE; TR/TE =12 ms/5.6 ms; image matrix =256×240x 208 mm <sup>3</sup> ; voxel size=1 mm <sup>3</sup>                                                                          | 5.3                                 |
| <b>Sao Paulo-1</b> | SCID             | No head trauma, neurological or psychiatric history, no lifetime alcohol or substance abuse.                                                                                                                                                 | 1.5T Siemens Espree                | T1-weighted 3D MPRAGE; TR/TE/TI/FA=2400 ms/3.65 ms/ 0 ms/8°; 160 contiguous sagittal slices; voxel size=1.3 x 1.3x 1.2 mm <sup>3</sup>                                                         | 5.3                                 |
| <b>Sao Paulo-3</b> | SCID             | No head trauma, neurological or psychiatric history, no lifetime alcohol or substance abuse. IQ>75                                                                                                                                           | 1.5T General Electric Signa        | T1-weighted FSPGR ; TR/TE/TI/FA=21.7 ms/52 ms /20°; 124 axial slices; voxel size= 0.86 x 0.86 x 1.5 mm <sup>3</sup>                                                                            | 5.3                                 |
| <b>SHIP-2</b>      | M-CIDI interview | No head trauma, no neurological and psychiatric history, no current alcohol abuse, no current use of psychotropic medication. No cognitive impairment.                                                                                       | 1.5T Siemens Avanto                | T1-weighted 3D MPRAGE; TR/TE/FA=1900ms/3.4ms/15°; voxel size=1mm <sup>3</sup>                                                                                                                  | 5.1 (cortical)<br>5.3 (subcortical) |
| <b>SHIP-TREND</b>  | M-CIDI interview | No head trauma, no neurological and psychiatric history, no current alcohol abuse, no current use of psychotropic medication. No cognitive impairment.                                                                                       | 1.5T Siemens Avanto                | T1-weighted 3D MPRAGE; TR/TE/FA=1900ms/3.4ms/15°; voxel size=1 mm <sup>3</sup>                                                                                                                 | 5.1 (cortical)<br>5.3 (subcortical) |
| <b>Stages-Dep</b>  | SCID-I           | No head trauma, no medical, neurological or psychiatric history, no lifetime alcohol or substance abuse, no previous or current use of psychotropic medication, IQ>75. No history of any psychiatric disorders in 1st degree family members. | 3T Phillips Achieva                | T1-weighted 3D-MPRAGE; TR/TE/TI/FA =6.7 ms/3.2 ms/200 ms/88°; °; image matrix = 288 x 288; 170 consecutive sagittal slices; voxel size= 0.896×0.896×1.2 mm <sup>3</sup>                        | 5.1                                 |
| <b>Stanford</b>    | SCID             | No head trauma, no medical, neurological or psychiatric history, no lifetime alcohol or substance abuse, no previous or current use of psychotropic medication. no mild cognitive impairment.                                                | 1.5T General Electric Signa Excite | T1-weighted SPGR; TR/TE/TI/FA=8.3-10.3 ms/1.7-3.0 ms/300 ms/15°; image matrix= 256 x 192; 176 contiguous sagittal slices; voxel size=0.86x0.86x1.5 mm <sup>3</sup> ; sagittal plan acquisition | 5.3                                 |

|                   |                    |                                                                                                                                                                                                                                                                |                                               |                                                                                                                                                           |     |
|-------------------|--------------------|----------------------------------------------------------------------------------------------------------------------------------------------------------------------------------------------------------------------------------------------------------------|-----------------------------------------------|-----------------------------------------------------------------------------------------------------------------------------------------------------------|-----|
| <b>StrokeMRI</b>  | Personal interview | No head trauma, no medical, neurological or psychiatric history, no lifetime alcohol or substance abuse, no previous or current use of psychotropic medication, IQ>75.                                                                                         | 3T General Electric 750 Discovery MRI scanner | T1-weighted FSPGR (BRAVO); TR/TE/TI/FA=8.16 s/3.18 ms/450 ms/12°; 188 sagittal slices; voxel size= 1.0x1.0x1.2 mm; FOV: 256 x 256 mm; scan time: 4:43 min | 5.3 |
| <b>SYDNEY</b>     | SCID               | No head trauma, no medical history, neurological or psychiatric history, no alcohol or substance abuse preceding 6 months, as well as no previous or current use of psychotropic medication, IQ>75.                                                            | 3T General Electric Discovery MR750           | T1-weighted 3D MPRAGE; TR/TE/FA= 7264ms/ 2784ms/15°; image matrix =256 x 256 x 196; voxel size=0.9mm <sup>3</sup>                                         | 5.1 |
| <b>Sydney MAS</b> | Personal interview | No head trauma, no diagnosis of dementia, schizophrenia, bipolar disorder no psychotic symptoms, no neurological disorder, no mild cognitive impairment, IQ>75.                                                                                                | 3T Philips Achieva Quasar Dual                | TR/TE = 6.39 ms/2.9 ms; 190 coronal slices; voxel size = 1mm <sup>3</sup>                                                                                 | 5.3 |
| <b>TOP</b>        | PRIME-MD           | No head trauma, no organic or other psychotic disorder (ICD codes 290-299), no substance abuse in the preceding 6 months, no previous or current use of psychotropic medication, IQ>75. No history of any psychiatric disorders in 1st degree family members.  | 1.5T Siemens Magnetom Sonata                  | T1-weighted SPGR; TR/TE/TI/FA=2730 ms/3.93 ms/1000 ms/71°; voxel size = 1.33x0.94x1mm <sup>3</sup> ; sagittal plane acquisition                           | 5.3 |
| <b>Tuebingen</b>  | SCID I and II      | No head trauma, no medical history, neurological or psychiatric history, no lifetime alcohol or substance abuse as well as no previous or current use of psychotropic medication, IQ>75. No history of any psychiatric disorders in 1st degree family members. | 1.5T Siemens Avanto                           | T1-weighted 3D MPRAGE; TR/TE/FA= 2250ms/ 3.93ms/8°; image matrix =256 x 256; voxel size=1mm <sup>3</sup>                                                  | 5.3 |
| <b>UMCU</b>       | CASH               | No head trauma, no medical, neurological or psychiatric history, no lifetime alcohol or substance abuse, no previous or current use of psychotropic medication, IQ>75. No history of any psychiatric disorders in 1st degree family members.                   | 3T Philips Achieva                            | T1-weighted 3D TFE; TE/TR/FA= 4.50 ms/9.96 ms/ 8°; FOV=224mm; image matrix = 256x256 mm; voxel size=.875x.875x1 mm <sup>3</sup>                           | 5.3 |
| <b>UNIBA</b>      | SCID-NP            | No head trauma, no medical, neurological or psychiatric history, no lifetime alcohol or substance abuse, no previous or current use                                                                                                                            | 3T General Electric                           | T1-weighted 3D SPGR; TE/FA = min full/ 6°; image matrix= 256x256 x124                                                                                     | 5.3 |

|              |          |                                                                                                                                                                                                                                                                           |                           |                                                                                                            |     |
|--------------|----------|---------------------------------------------------------------------------------------------------------------------------------------------------------------------------------------------------------------------------------------------------------------------------|---------------------------|------------------------------------------------------------------------------------------------------------|-----|
|              |          | of psychotropic medication, IQ>75. No history of any psychiatric disorders in 1st degree family members.                                                                                                                                                                  |                           |                                                                                                            |     |
| <b>UPENN</b> | SCID     | No head trauma, no medical history, including neurological and psychiatric history, no alcohol or substance abuse preceding 6 months, no previous or current use of psychotropic medication, IQ>75. No history of any psychiatric disorders in 1st degree family members. | 3T Siemens Tim Trio       | T1-weighted 3D MPRAGE;<br>TR/TE/TI/FA=1810 ms/3.51 ms/1100 ms/9°; image matrix= 256 × 192;160 axial slices | 5.3 |
| <b>Yale</b>  | KSADS-PL | No head trauma, neurological or psychiatric history, no alcohol or substance abuse in the preceding 6 months, no previous or current use of psychotropic medication, IQ>75.                                                                                               | 3T General Electric Signa | T1-weighted 3D MPRAGE; image matrix =256×256; voxel size=0.976 x 0.976 x 1 mm3                             | 5.3 |

Abbreviations of Terms: BDI = Behavioural Descriptive Interview; BSI = Brief Symptom Inventory; CASH = Comprehensive assessment of symptoms and history; CDR = Clinical Dementia Rating; CIDI = Composite International Diagnostic Interview; DAWBA = Development and Well-Being Assessment; DISC-IV = Diagnostic Interview Schedule for Children; DSM = Diagnostic and Statistical Manual of Mental Disorders (DSM); FA=flip angle; FSPGR=fast spoiled gradient echo sequence; GRE=spoiled gradient echo sequence; ICD= International Classification of Diseases; IR= inversion recovery; KSADS-PL= Kiddie Schedule for Affective Disorders and Schizophrenia-Present and Lifetime; MADRS = Montgomery-Asberg Depression Rating Scale; MINI = Mini International Neuropsychiatric Interview; MMSE = Mini Mental State Exam; PRIME-MD = Primary Care Evaluation of Mental Disorder; SCID = Structured Clinical Interview for DSM Disorders; SCID-I/NP = SCID Non-Patient version; SPGR=spoiled gradient recalled sequence; STAI = State-Trait Anxiety Inventory; STAS = State-trait anger scale; TE=echo time; TI=inversion time; TR=repetition time; TFE=turbo field echo sequence; YBOCS = Yale-Brown Obsessive Compulsive Scale

Abbreviations of studies: **ADHD-NF = Attention Deficit Hyperactivity Disorder- Neurofeedback Study**; **AMC = Amsterdam Medisch Centrum**; **Basel = University of Basel**; **Betula = Swedish longitudinal study on aging, memory, and dementia**; **BIG = Brain Imaging Genetics**; **Bonn = University of Bonn**; **Bordeaux = University of Bordeaux**; **BrainSCALE=Brain Structure and Cognition: an Adolescence Longitudinal twin study into Etiology**; **BRCATLAS= NIHR Biomedical Research Centre/ Mapping the relationship between the white matter and executive function across the adult lifespan**; **CAMH = Centre for Addiction and Mental Health**; **Cardiff = Cardiff University**; **CEG = Cognitive-experimental and Genetic study of ADHD and Control Sibling Pairs**; **CIAM = Cortical Inhibition and Attentional Modulation study**; **CLiNG = Clinical Neuroscience Göttingen**; **CODE = Chronic Depression Study**; **ENIGMA-HIV = Enhancing NeuroImaging Genetics through Meta-Analysis-Human Immunodeficiency Virus Working Group**; **ENIGMA-OCD = Enhancing NeuroImaging Genetics through Meta-Analysis- Obsessive Compulsive Disorder Working Group**; **FBIRN = Function Biomedical Informatics Research Network**; **EDINBURGH = The University of Edinburgh**; **GSP = Brain Genomics Superstruct Project (<http://neuroinformatics.harvard.edu/gsp/>; Holmes et al., *Sci Data* 2015; <http://www.nature.com/articles/sdata201531>)**; **HMS = Homburg Multidiagnosis Study**; **ENIGMA-OCD (IDIBELL)**; **FIDMAG = Fundación para la Investigación y Docencia Maria Angustias Giménez**; **HUBIN = Human Brain Informatics**; **IDIVAL = Valdecilla Biomedical Research Institute**; **IMAGEN = the IMAGEN Consortium**; **IMH=Institute of Mental Health, Singapore**; **IMpACT = The International Multicentre persistent ADHD Genetics Collaboration**; **Indiana = Indiana University School of Medicine**; **KaSP= The Karolinska Schizophrenia Project**; **Leiden = Leiden University**; **MCIC = MIND Clinical Imaging Consortium formed by the Mental Illness and Neuroscience Discovery (MIND) Institute now the Mind Research Network (MRN; <http://ww.mrn.org>)**; **Melbourne = University of Melbourne**; **Meth-CT = methamphetamine use; University of Cape Town**; **MHRC = Mental Health Research Center**; **Muenster = Muenster University**; **NESDA = The Netherlands Study of Depression and Anxiety**; **Neuroventure =** ; **NTR = Netherlands Twin Register**; **NU = Northwestern University**; **NYU = New York University**; **OLIN = Olin Neuropsychiatric Research Center**; **NUIG = National University of Ireland Galway**; **OATS = Older Australian Twins Study**; **Oxford =Oxford University**; **QTIM = Queensland Twin Imaging**; **Sao Paulo = University of Sao Paulo**; **SHIP = Study of Health in Pomerania**; **Stages-Dep= Stages of Depression Study**; **Stanford = Stanford University**; **StrokeMRI = Stroke Magnetic Resonance Imaging**; **SYDNEY = University of Sydney**; **Sydney MAS = Sydney Memory and Ageing Study**; **TOP = Tematisk Område Psykoser (Thematically Organized Psychosis Research)**; **Tuebingen = University of Tuebingen**; **UMCU = Universitair Medisch Centrum Utrecht**; **UNIBA = University of Bari Aldo Moro**; **UPENN=University of Pennsylvania**; **Yale = Yale University**
